# Supplementary material
Source: PubMed Central journal article supplement (PMC8659780)
Supplement: mmc1.pdf [file mmc1.pdf]

**Table S1. ABCB5<sup>+</sup> MSC product release data**

| Date of production | Patient | Responder | Lot          | Vitality <sup>1</sup> | Viability <sup>2,3</sup> | Potency <sup>3</sup>          |                              |                             |                                   |        |
|--------------------|---------|-----------|--------------|-----------------------|--------------------------|-------------------------------|------------------------------|-----------------------------|-----------------------------------|--------|
|                    |         |           |              |                       |                          | Immunomodulation              |                              | Angiogenesis:               | Endothelial trans-differentiation |        |
|                    |         |           |              |                       |                          | IL-1RA secretion <sup>4</sup> |                              | VEGF secretion <sup>5</sup> | Tube formation <sup>6</sup>       |        |
| dd/mm/yyyy         | #       | Y/N       | #            | % of cells            | % of cells               | pg/ml                         | Ratio <sub>stim/unstim</sub> | pg/ml                       | Well 1                            | Well 2 |
| 11/01/2018         | 01-003  | Y         | C-AL04000-01 | 98.3                  | 99.4                     | 4,838                         | 1.9                          | > 49.6                      | B                                 | B      |
| 19/04/2018         | 01-005  | N         | C-AL05000-03 | 98.2                  | 99.8                     | 4,318                         | 1.8                          | > 49.6                      | B                                 | C      |
| 26/06/2018         | 03-001  | Y         | C-AL05000-04 | 98.9                  | 96.6                     | 3,859                         | 2.3                          | > 49.6                      | B                                 | B      |
| 26/07/2018         | 01-007  | Y         | C-AL05000-07 | 98.4                  | 99.3                     | 8,550                         | 3.0                          | > 49.6                      | A                                 | B      |
| 14/08/2018         | 01-008  | Y         | C-AL05000-08 | 97.6                  | 99.3                     | 8,550                         | 3.0                          | > 49.6                      | A                                 | B      |
| 06/09/2018         | 01-009  | N         | C-AL05000-10 | 96.8                  | 99.5                     | 7,730                         | 2.7                          | > 49.6                      | A                                 | B      |
| 06/09/2018         | 01-007  | Y         | C-AL05000-11 | 98.6                  | 99.0                     | 3,835                         | 2.0                          | > 49.6                      | B                                 | B      |
| 12/09/2018         | 05-001  | N         | C-AL05000-12 | 96.4                  | 99.5                     | 7,730                         | 2.7                          | > 49.6                      | A                                 | B      |
| 24/09/2018         | 07-001  | Y         | C-AL05000-13 | 95.9                  | 99.3                     | 8,550                         | 3.0                          | > 49.6                      | A                                 | B      |
| 26/09/2018         | 01-008  | Y         | C-AL05000-14 | 96.6                  | 99.3                     | 8,550                         | 3.0                          | > 49.6                      | A                                 | B      |
| 23/10/2018         | 01-009  | N         | C-AL04000-04 | 95.0                  | 95.6                     | 4,802                         | 3.3                          | > 49.6                      | A                                 | A      |
| 23/10/2018         | 08-001  | Y         | C-AL04000-05 | 98.5                  | 99.7                     | 5,535                         | 2.2                          | > 49.6                      | B                                 | B      |
| 24/10/2018         | 05-001  | N         | C-AL04000-06 | 97.5                  | 95.6                     | 4,802                         | 3.3                          | > 49.6                      | A                                 | A      |
| 28/11/2018         | 05-002  | Y         | C-AL05000-15 | 97.0                  | 99.6                     | 15,450                        | 5.7                          | > 49.6                      | B                                 | B      |
| 05/12/2018         | 05-004  | Y         | C-AL05000-17 | 97.0                  | 99.0                     | 3,835                         | 2.0                          | > 49.6                      | B                                 | B      |

| Date of production | Patient | Responder | Lot          | Vitality <sup>1</sup> | Viability <sup>2,3</sup> | Potency <sup>3</sup>          |                               |                             |                                   |        |
|--------------------|---------|-----------|--------------|-----------------------|--------------------------|-------------------------------|-------------------------------|-----------------------------|-----------------------------------|--------|
|                    |         |           |              |                       |                          | Immunomodulation              |                               | Angiogenesis:               | Endothelial trans-differentiation |        |
|                    |         |           |              |                       |                          | IL-1RA secretion <sup>4</sup> | Ratio <sub>Ostim/unstim</sub> | VEGF secretion <sup>5</sup> | Tube formation <sup>6</sup>       |        |
| dd/mm/yyyy         | #       | Y/N       | #            | % of cells            | % of cells               | pg/ml                         | Ratio <sub>Ostim/unstim</sub> | pg/ml                       | Well 1                            | Well 2 |
| 11/12/2018         | 08-001  | Y         | C-AL05000-18 | 95.5                  | 99.0                     | 3,835                         | 2.0                           | > 46.9                      | B                                 | B      |
| 10/01/2019         | 05-002  | Y         | C-AL05000-19 | 98.0                  | 99.6                     | 15,450                        | 5.7                           | > 46.9                      | B                                 | B      |
| 16/01/2019         | 05-004  | Y         | C-AL04000-09 | 95.5                  | 99.5                     | 10,991                        | 3.1                           | > 46.9                      | B                                 | B      |
| 14/05/2019         | 04-002  | N         | C-AL05000-24 | 96.5                  | 99.0                     | 3,835                         | 2.0                           | > 46.9                      | B                                 | B      |
| 23/05/2019         | 05-005  | N         | C-AL04000-14 | 96.5                  | 99.4                     | 6,126                         | 2.3                           | > 46.9                      | B                                 | B      |
| 29/05/2019         | 01-011  | Y         | C-AL04000-16 | 97.0                  | 99.1                     | 10,130                        | 2.9                           | > 46.9                      | B                                 | B      |
| 03/07/2019         | 05-005  | N         | C-AL08000-08 | 96.5                  | 99.7                     | 7,450                         | 2.5                           | > 46.9                      | B                                 | C      |
| 03/07/2019         | 04-002  | N         | C-AL05000-31 | 96.0                  | 98.2                     | 3,268                         | 2.3                           | > 46.9                      | A                                 | A      |
| 10/07/2019         | 01-011  | Y         | C-AL05000-32 | 96.5                  | 99.3                     | 16,180                        | 6.0                           | > 46.9                      | B                                 | B      |
| 31/07/2019         | 02-003  | Y         | C-AL05000-33 | 97.0                  | 99.9                     | 3,931                         | 2.4                           | > 46.9                      | A                                 | B      |
| 08/08/2019         | 05-006  | Y         | C-AL05000-34 | 96.0                  | 99.3                     | 16,180                        | 6.0                           | > 46.9                      | B                                 | B      |
| 22/08/2019         | 01-012  | Y         | C-AL07000-08 | 97.0                  | 99.8                     | 5,370                         | 3.0                           | > 46.9                      | C                                 | C      |
| 12/09/2019         | 02-003  | Y         | C-AL07000-10 | 95.5                  | 99.5                     | 7,340                         | 3.3                           | > 46.9                      | B                                 | B      |
| 12/09/2019         | 05-007  | Y         | C-AL07000-11 | 92.0                  | 99.4                     | 7,820                         | 3.4                           | > 46.9                      | B                                 | B      |
| 12/09/2019         | 05-009  | N         | C-AL07000-12 | 93.0                  | 99.4                     | 7,820                         | 3.4                           | > 46.9                      | B                                 | B      |
| 19/09/2019         | 05-006  | Y         | C-AL07000-14 | 94.5                  | 99.4                     | 7,820                         | 3.4                           | > 46.9                      | B                                 | B      |
| 30/09/2019         | 06-002  | Y         | C-AL05000-35 | 95.0                  | 99.3                     | 16,180                        | 6.0                           | > 46.9                      | B                                 | B      |

| Date of production | Patient | Responder         | Lot          | Vitality <sup>1</sup> | Viability <sup>2,3</sup> | Potency <sup>3</sup>          |                               |                             |                                   |        |
|--------------------|---------|-------------------|--------------|-----------------------|--------------------------|-------------------------------|-------------------------------|-----------------------------|-----------------------------------|--------|
|                    |         |                   |              |                       |                          | Immunomodulation              |                               | Angiogenesis:               | Endothelial trans-differentiation |        |
|                    |         |                   |              |                       |                          | IL-1RA secretion <sup>4</sup> |                               | VEGF secretion <sup>5</sup> | Tube formation <sup>6</sup>       |        |
| dd/mm/yyyy         | #       | Y/N               | #            | % of cells            | % of cells               | pg/ml                         | Ratio <sub>Ostim/unstim</sub> | pg/ml                       | Well 1                            | Well 2 |
| 02/10/2019         | 01-012  | Y                 | C-AL05000-36 | 93.5                  | 99.3                     | 16,180                        | 6.0                           | > 46.9                      | B                                 | B      |
| 24/10/2019         | 05-009  | N                 | C-AL05000-38 | 96.0                  | 99.3                     | 16,180                        | 6.0                           | > 46.9                      | B                                 | B      |
| 24/10/2019         | 05-007  | Y                 | C-AL05000-39 | 96.5                  | 99.3                     | 16,180                        | 6.0                           | > 46.9                      | B                                 | B      |
| 30/10/2019         | 02-005  | N                 | C-AL05000-41 | 95.5                  | 98.6                     | 16,430                        | 6.5                           | > 46.9                      | B                                 | A      |
| 14/11/2019         | 06-002  | Y                 | C-AL07000-19 | 97.5                  | 99.7                     | 7,250                         | 4.0                           | > 46.9                      | B                                 | C      |
| 27/11/2019         | 09-004  | Y                 | C-AL07000-21 | 96.5                  | 99.7                     | 7,250                         | 4.0                           | > 46.9                      | B                                 | C      |
| 12/12/2019         | 02-005  | N                 | C-AL08000-14 | 97.4                  | 99.7                     | 7,450                         | 2.5                           | > 46.9                      | B                                 | C      |
| 08/01/2020         | 04-004  | Y                 | C-AL07000-23 | 96.3                  | 99.6                     | 6,970                         | 3.1                           | > 46.9                      | B                                 | C      |
| 10/01/2020         | 04-006  | N                 | C-AL07000-24 | 96.4                  | 99.7                     | 7,250                         | 4.0                           | > 46.9                      | B                                 | C      |
| 14/01/2020         | 08-002  | Y                 | C-AL08000-16 | 97.8                  | 99.1                     | 2,880                         | 2.4                           | > 46.9                      | C                                 | B      |
| 15/01/2020         | 04-005  | Y                 | C-AL07000-27 | 95.5                  | 99.7                     | 3,789                         | 2.8                           | > 46.9                      | B/C                               | C/B    |
| 21/01/2020         | 02-009  | Y                 | C-AL05000-42 | 94.9                  | 99.3                     | 16,180                        | 6.0                           | > 46.9                      | B                                 | B      |
| 21/01/2020         | 02-008  | n.a. <sup>7</sup> | C-AL05000-43 | 94.4                  | 99.3                     | 16,180                        | 6.0                           | > 46.9                      | B                                 | B      |
| 30/01/2020         | 02-010  | Y                 | C-AL07000-30 | 93.3                  | 99.5                     | 7,340                         | 3.3                           | > 46.9                      | B                                 | B      |
| 17/02/2020         | 06-003  | Y                 | C-AL05000-44 | 91.2                  | 98.6                     | 16,430                        | 6.5                           | > 46.9                      | B                                 | A      |
| 19/02/2020         | 04-004  | Y                 | C-AL05000-45 | 97.0                  | 98.6                     | 16,430                        | 6.5                           | > 46.9                      | B                                 | A      |
| 25/02/2020         | 04-006  | N                 | C-AL05000-46 | 94.9                  | 98.6                     | 16,430                        | 6.5                           | > 46.9                      | B                                 | A      |

| Date of production                                     | Patient | Responder | Lot          | Vitality <sup>1</sup> | Viability <sup>2,3</sup> | Potency <sup>3</sup>          |                               |                             |                                   |        |
|--------------------------------------------------------|---------|-----------|--------------|-----------------------|--------------------------|-------------------------------|-------------------------------|-----------------------------|-----------------------------------|--------|
|                                                        |         |           |              |                       |                          | Immunomodulation              |                               | Angiogenesis:               | Endothelial trans-differentiation |        |
|                                                        |         |           |              |                       |                          | IL-1RA secretion <sup>4</sup> |                               | VEGF secretion <sup>5</sup> | Tube formation <sup>6</sup>       |        |
| dd/mm/yyyy                                             | #       | Y/N       | #            | % of cells            | % of cells               | pg/ml                         | Ratio <sub>Ostim/unstim</sub> | pg/ml                       | Well 1                            | Well 2 |
| 27/02/2020                                             | 02-011  | N         | C-AL07000-32 | 93.1                  | > 46.9                   | 7,820                         | 3.4                           | > 49.6                      | B                                 | B      |
| 03/03/2020                                             | 04-005  | Y         | C-AL05000-47 | 95.2                  | > 46.9                   | 16,430                        | 6.5                           | > 49.6                      | B                                 | A      |
| 04/03/2020                                             | 02-009  | Y         | C-AL08000-19 | 98.1                  | > 46.9                   | 2,880                         | 2.4                           | > 49.6                      | C                                 | B      |
| 12/03/2020                                             | 02-010  | Y         | C-AL10000-12 | 93.7                  | > 46.9                   | 10,740                        | 2.0                           | > 49.6                      | B                                 | C      |
| <b>Specification</b>                                   |         |           |              | <b>≥ 75%</b>          | <b>≥ 90%</b>             | <b>&gt; 125</b>               | <b>&gt; 1</b>                 | <b>&gt; 46.9</b>            | <b>A, B or C</b>                  |        |
| <b>% of products fulfilling the specification</b>      |         |           |              | <b>100%</b>           | <b>100%</b>              | <b>100%</b>                   | <b>100%</b>                   | <b>100%</b>                 | <b>100%</b>                       |        |
| <b>Mean (SD) all products</b>                          |         |           |              | 96.1<br>(1.7)         | 99.1<br>(0.9)            | 9,157.2<br>(4,830.8)          | 3.7<br>(1.6)                  |                             |                                   |        |
| <b>Mean (SD) products applicated to responders</b>     |         |           |              | 96.2<br>(1.8)         | 99.3<br>(0.6)            | 9,436.3<br>(4,944.3)          | 3.8<br>(1.6)                  |                             |                                   |        |
| <b>Mean (SD) products applicated to non-responders</b> |         |           |              | 96.0<br>(1.4)         | 98.8<br>(1.3)            | 8,090.1<br>(4,378.4)          | 3.5<br>(1.5)                  |                             |                                   |        |

For more detailed description of the release testing algorithm and the methods see Ballikaya et al. (2020).

<sup>1</sup>Defined as percentage of live cells determined as propidium iodide-excluding cells.

<sup>2</sup>Defined as percentage of metabolically active cells determined as cells converting calcein acetoxymethylester to calcein.

<sup>3</sup>Values were adopted from drug substance release testing; transferability of the result from drug substance release testing onto the final drug product was demonstrated in stability studies and method validation (Ballikaya et al., 2020).

<sup>4</sup>Determined after cocultivation with M1-polarized macrophages to evaluate the immunomodulatory potency of the ABCB5<sup>+</sup> MSCs.

<sup>5</sup>Determined after 48 h culture under hypoxic conditions to evaluate the angiogenic potency of the ABCB5<sup>+</sup> MSCs.

<sup>6</sup>Determined after 19-22 h incubation on extracellular matrix gel to evaluate the endothelial trans-differentiation capacity of the ABCB5<sup>+</sup> MSCs.

A: tubular branches of several cells forming a defined network-like structure; B: tubular branches of several cells clustering together forming broad strands, formation of syncytia, areas of high cellular density lacking formation of tubular branches; C: cells clustering together, building nodes and forming tubular branches that connect the nodes with each other; D: only sporadic cells form tubular branches, partial node formation, but no or nearly no connections between nodes, no or only sporadic apoptotic cells; E: largely apoptotic cells, no or only sporadic tubular branches; F: no tubular branches.

<sup>7</sup>Subject dropped out before week 12.

**Reference:**

Ballikaya S, Sadeghi S, Niebergall-Roth E, Nimitz L, Frindert J, Norrick A et al. Process data of allogeneic ex-vivo expanded highly pure ABCB5<sup>+</sup> mesenchymal stromal cells for human use: Off-the-shelf GMP-manufactured standardized and donor-independent ATMP. *Stem Cell Res Ther* 2020; 11:482.
